# Supplementary material for: A five-miRNA signature with prognostic and predictive value for MGMT promoter-methylated glioblastoma patients
Source: PubMed Central journal article supplement (PMC4745726; doi:10.18632/oncotarget.4978), 2015-07-22
Supplement: oncotarget-06-29285-s001.pdf [file oncotarget-06-29285-s001.pdf]

# A five-miRNA signature with prognostic and predictive value for *MGMT* promoter-methylated glioblastoma patients

## Supplementary Material

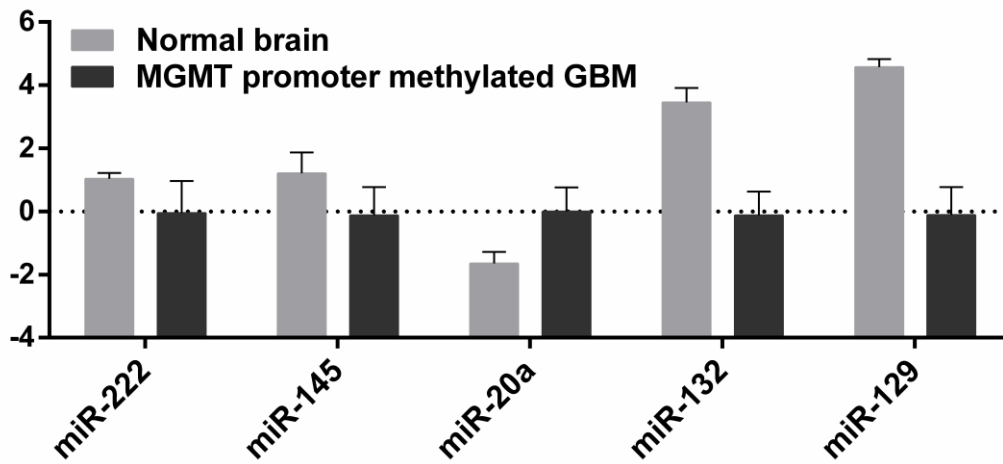

**Figure S1.** Comparison of the expression levels of five miRNAs comprising the miRNA signature between normal brain tissue and GBM specimens with *MGMT* promoter methylation. Bars indicate standard deviation.

## Independent set

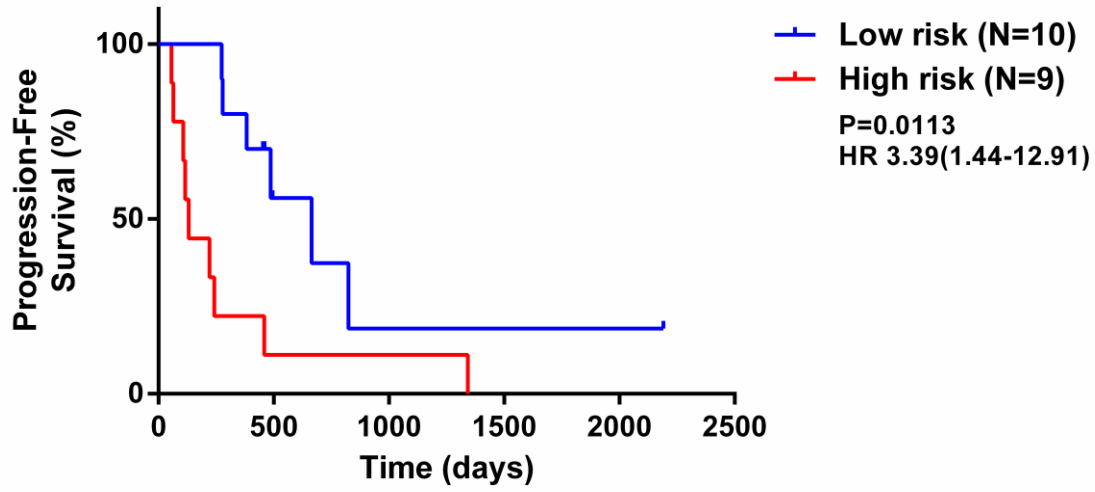

Figure S2. Prognostic value of the five-miRNA signature for PFS using independent set.

**A** GBM without *MGMT* promoter methylation  
Cutoff: 0.0178

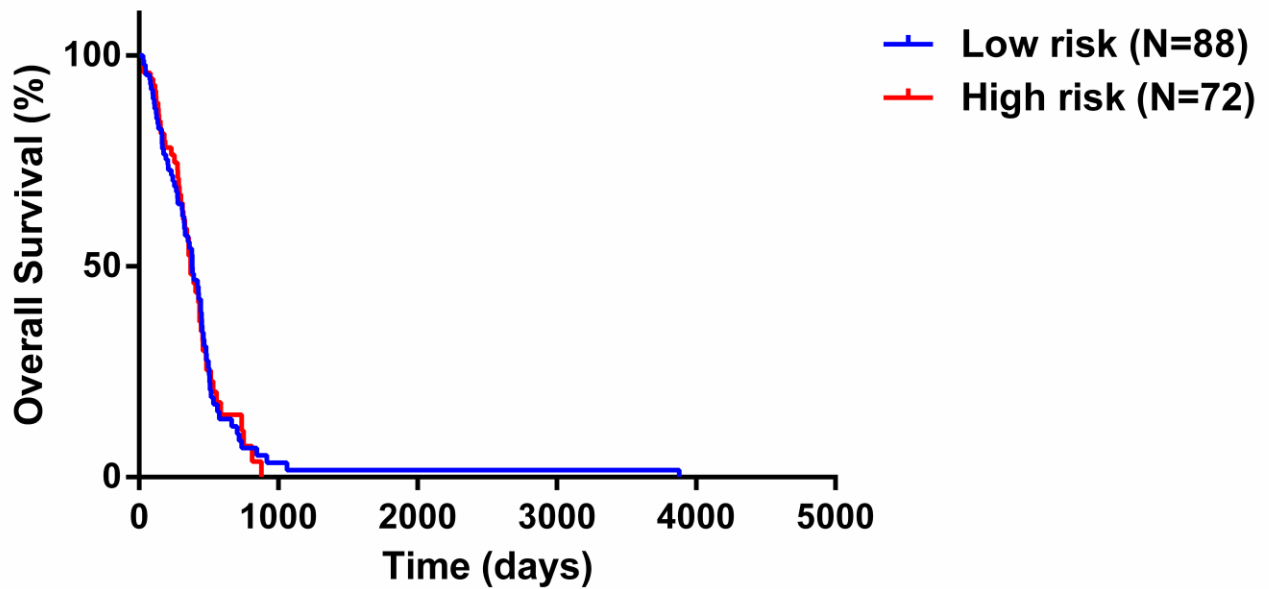

**B** GBM without *MGMT* promoter methylation  
Cutoff: median risk score

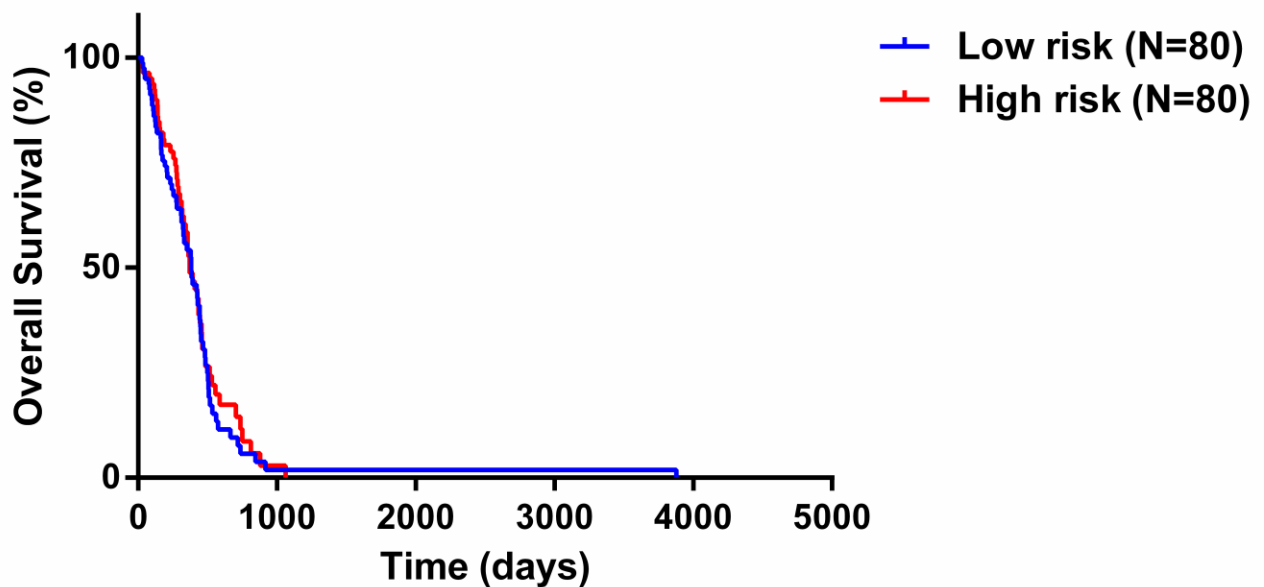

**Figure S3.** Lack of prognostic value for the five-miRNA signature in GBM patients without *MGMT* promoter methylation using the cutoff value of 0.0178 (A) or the median risk value (B).

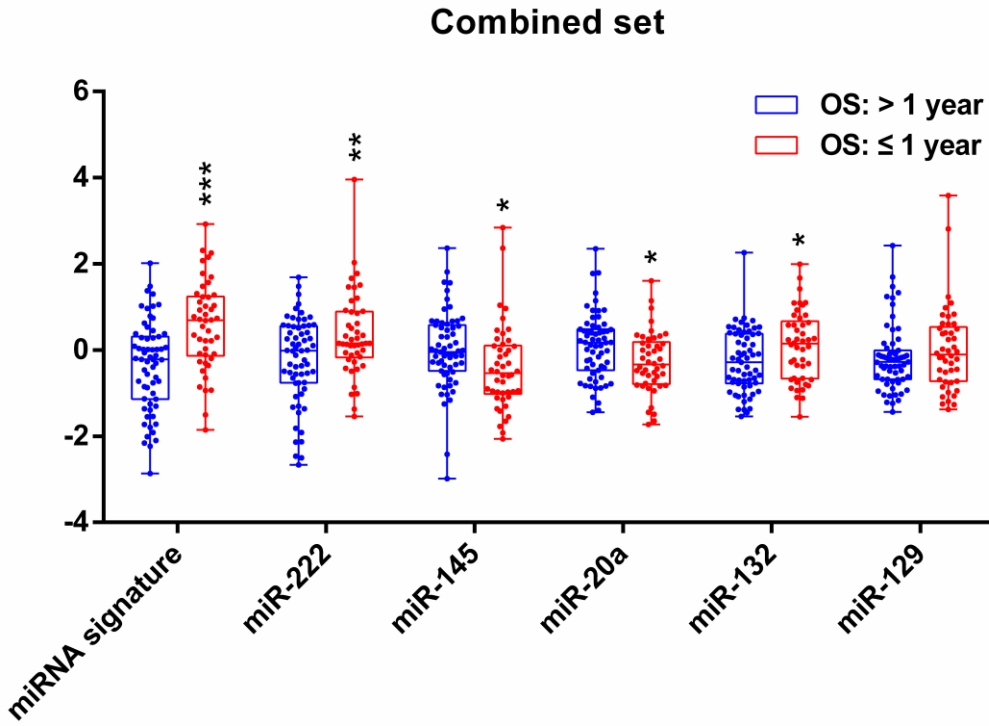

**Figure S4.** Comparison of the five-miRNA signature and its constituent miRNAs between cases with long and short survival time using a combined set. \* $P < 0.05$ , \*\* $P < 0.01$ , \*\*\* $P < 0.001$ .

## Independent set

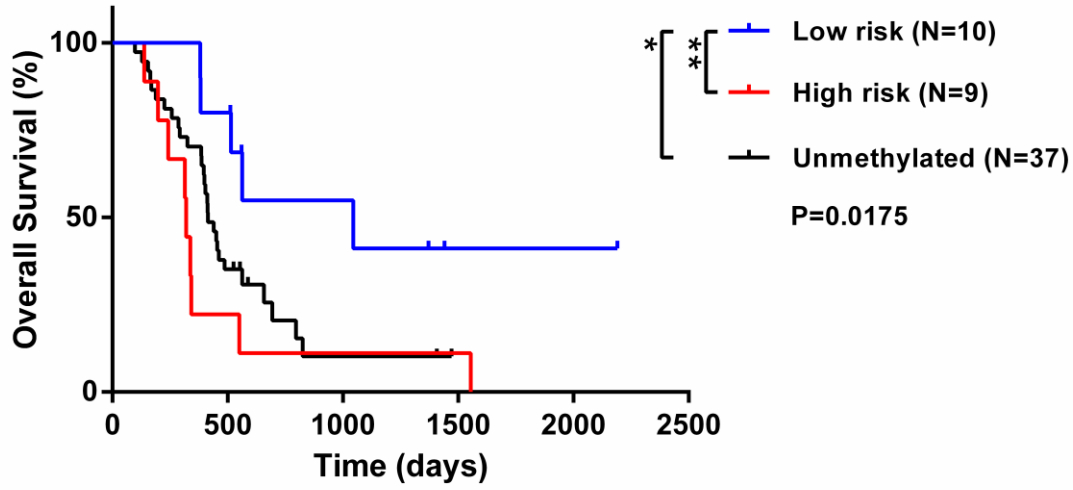

**Figure S5.** Prognosis of unmethylated GBM samples and high- and low-risk GBM patients with *MGMT* promoter methylation using an independent set. \*P < 0.05, \*\*P < 0.01, \*\*\*P < 0.001.

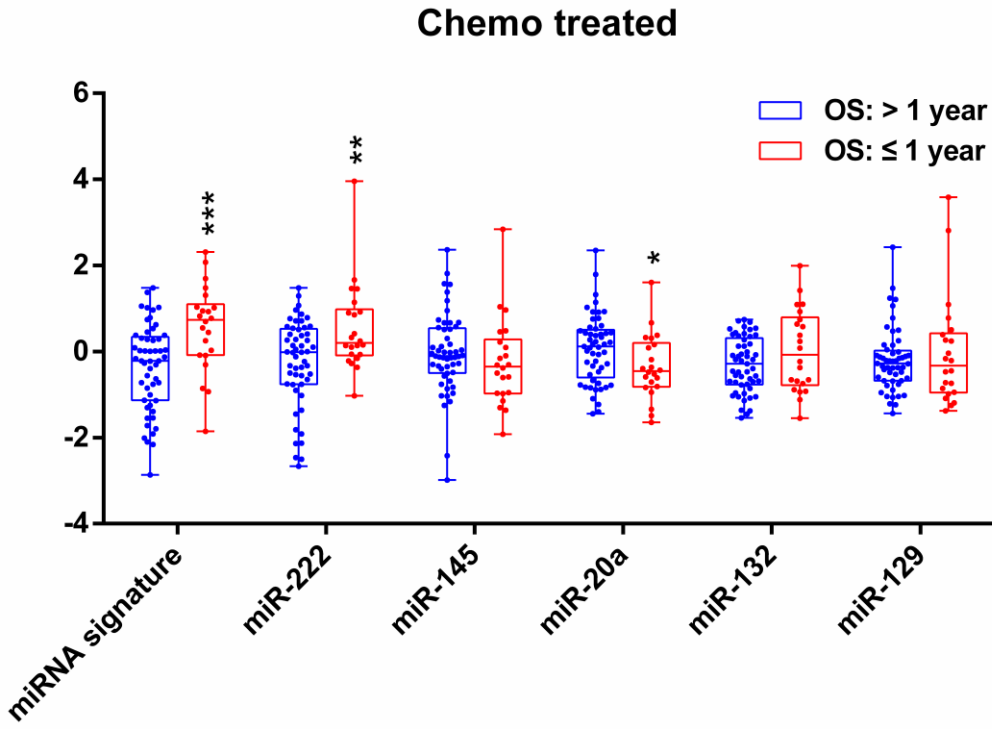

**Figure S6.** Comparison of the five-miRNA signature and its constituent miRNAs between chemotherapy responders and non-responders. \* $P < 0.05$ , \*\* $P < 0.01$ , \*\*\* $P < 0.001$ .

## Independent set

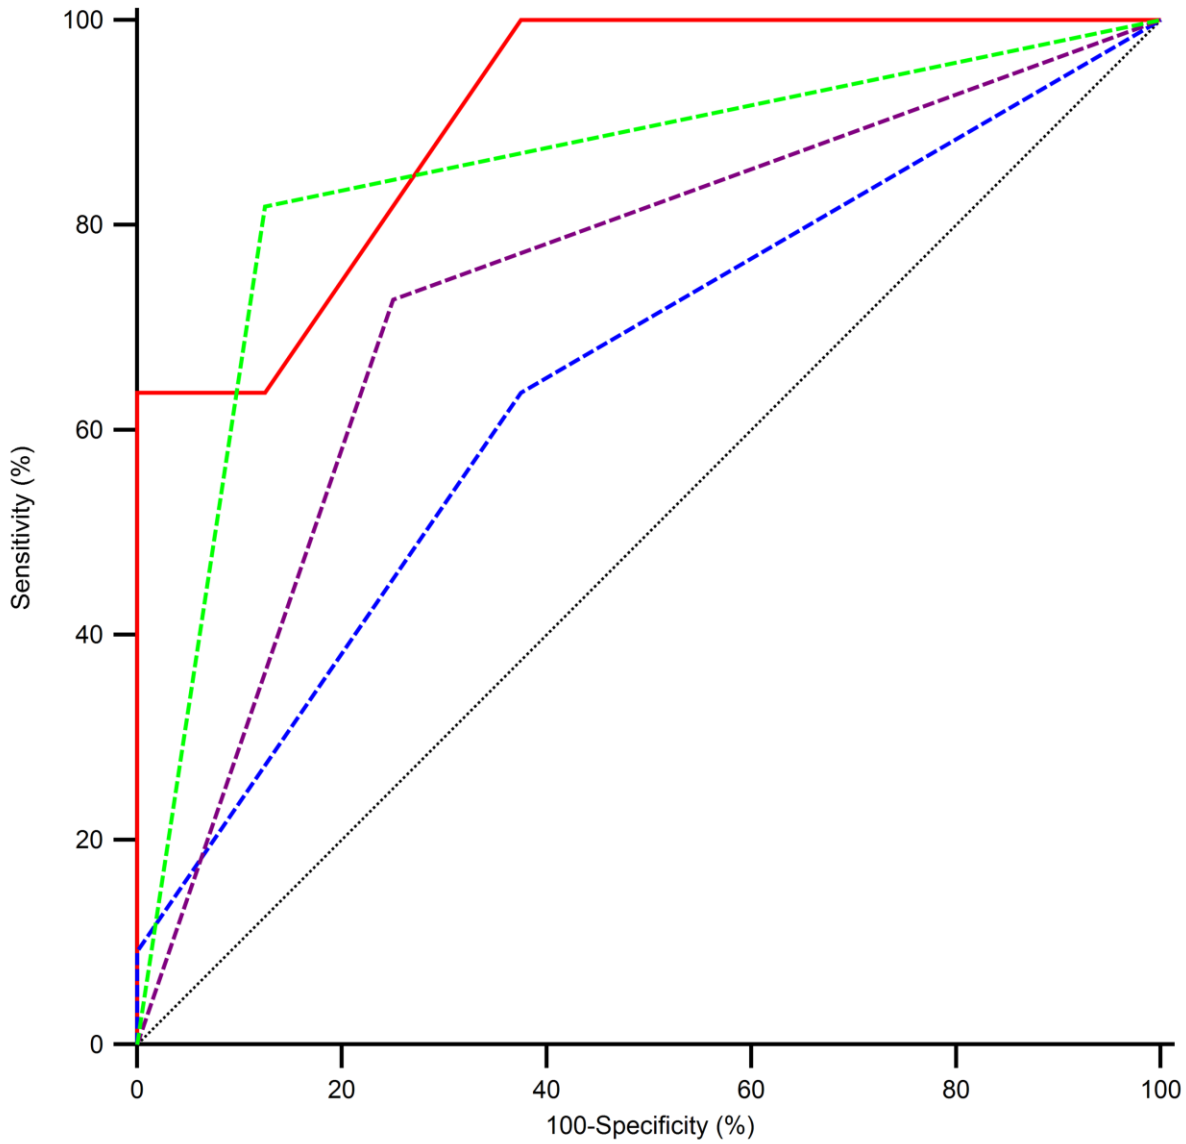

|                                                            | <b>AUROC</b> | <b>95% CI</b>  | <b>P-value</b> |
|------------------------------------------------------------|--------------|----------------|----------------|
| <span style="color: red;">—</span> Total points            | 0.909        | 0.687 to 0.991 |                |
| <span style="color: blue;">- - -</span> Age                | 0.648        | 0.399 to 0.849 | 0.0085         |
| <span style="color: purple;">- - -</span> Chemotherapy     | 0.739        | 0.490 to 0.910 | 0.0402         |
| <span style="color: green;">- - -</span> 5-miRNA signature | 0.847        | 0.610 to 0.968 | 0.4524         |

**Figure S7.** Sensitivity and specificity of the risk model for predicting 1-year survival using the independent set.

**Table S1. Univariate Cox regression of miRNAs for survival in training set.**

| Variable    | P-value | HR     | 95%CI         |
|-------------|---------|--------|---------------|
| hsa-miR-222 | 0.0112  | 1.6024 | 1.1129-2.3072 |
| hsa-miR-145 | 0.0132  | 0.5809 | 0.3780-0.8925 |
| hsa-miR-20a | 0.0202  | 0.6175 | 0.4112-0.9274 |
| hsa-miR-132 | 0.0218  | 1.6954 | 1.0797-2.6623 |
| hsa-miR-129 | 0.0456  | 1.3948 | 1.0066-1.9328 |

**Table S2. Cox hazard regression analysis of clinicopathologic factors and the five-miRNA signature for survival in the independent set**

| Variable                    | Univariate Cox |               | Multivariate Cox |               |
|-----------------------------|----------------|---------------|------------------|---------------|
|                             | P-value        | HR            | P-value          | HR            |
| <b>Age</b>                  |                |               |                  |               |
| (Per 20 years)              | 0.3845         | 1.4990        |                  |               |
| <b>Gender</b>               |                |               |                  |               |
| (Female vs. Male)           | 0.5433         | 0.7195        |                  |               |
| <b>KPS</b>                  |                |               |                  |               |
| (≥80 vs. <80)               | 0.4431         | 0.5296        |                  |               |
| <b>IDH1 mutation</b>        |                |               |                  |               |
| (Mutation vs. Wild type)    | 0.0469         | 0.1137        | 0.0305           | 0.0753        |
| <b>Radiotherapy</b>         |                |               |                  |               |
| (Treated vs. Untreated)     | 0.0530         | 0.2504        |                  |               |
| <b>Chemotherapy</b>         |                |               |                  |               |
| (Treated vs. Untreated)     | 0.0937         | 0.3798        |                  |               |
| <b>Five-miRNA signature</b> |                |               |                  |               |
| (High vs. Low risk)         | <b>0.0082</b>  | <b>4.5896</b> | <b>0.0090</b>    | <b>6.4662</b> |
